# Supplementary material for: A systematic examination of the relationships between CDOM and DOC in inland waters in China
Source: Copernicus journal article supplement (doi:10.5194/hess-2017-179), 2017-04-04
Supplement: Supplementary file 1 [file hess-2017-179-supplement.pdf]

## Supplementary material

Figure S1. Sampling location at three rivers for tracing the temporal variation of CDOM and DOC. The average widths at sampling stations are about 1020 m, 206m and 152 m for the Songhua River, Hunjiang River and Yalu River, respectively.

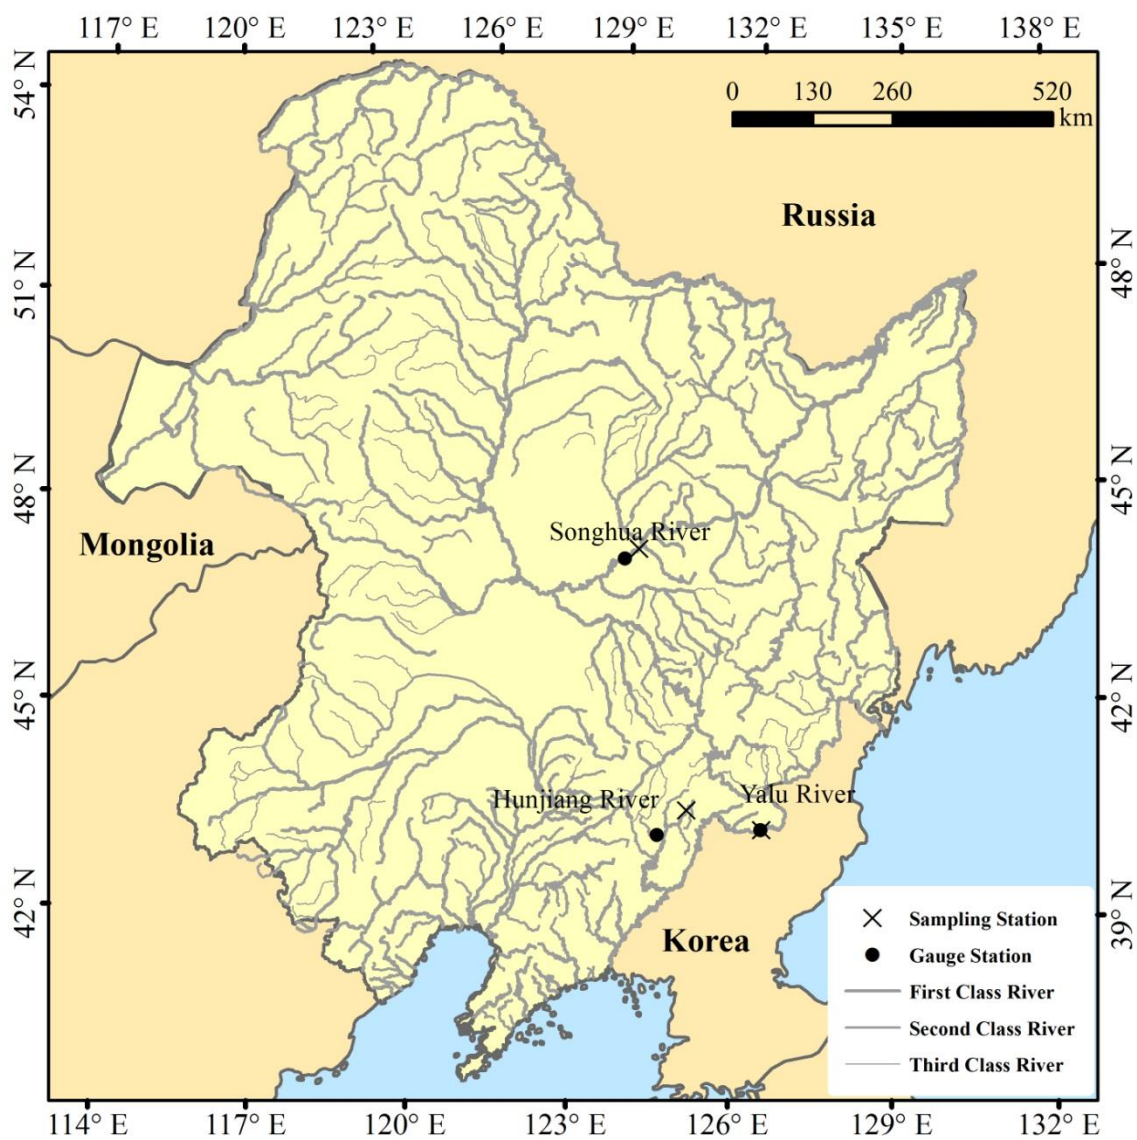

Table S1 the sampling information for fresh and saline water lakes, the location information shows the central positions of the lakes. Res. is the abbreviation for reservoir; N, numbers of samples collected; Lat., latitude; Long., longitude; A, area; L, maximum length in kilometer; W, maximum width in kilometer.

| Water types             | Sampling date | N  | Lat.    | Long.    | A(km <sup>2</sup> ) | L (km) | W (km) |
|-------------------------|---------------|----|---------|----------|---------------------|--------|--------|
| <b>Fresh water lake</b> |               |    |         |          |                     |        |        |
| Shitoukou Res.          | 2009.08.28    | 10 | 43.9319 | 125.7472 | 59                  | 17     | 6      |
| Songhua Lake            | 2015.04.29    | 8  | 43.6146 | 126.9492 | 185                 | 55     | 6      |
| Erlong Lake             | 2011.06.24    | 6  | 43.1785 | 124.8264 | 98                  | 29     | 8      |
| Xinlicheng Res.         | 2011.06.13    | 7  | 43.6300 | 125.3400 | 43                  | 22     | 6      |
| Yueliang Lake           | 2011.09.01    | 6  | 45.7250 | 123.8667 | 116                 | 15     | 15     |
| Nierji Res.             | 2015.09.16    | 8  | 48.6073 | 124.5693 | 436                 | 83     | 26     |
| Shankou Res.            | 2015.09.17    | 4  | 48.5280 | 126.8695 | 48                  | 11     | 11     |
| Hongqi Res.             | 2015.09.12    | 6  | 43.8922 | 125.1945 | 0.1                 | 0.6    | 0.4    |
| Jingpo Lake             | 2014.07.15    | 6  | 43.8416 | 128.9022 | 94                  | 33     | 18     |
| Xingkai Lake            | 2013.07.13    | 16 | 44.9417 | 132.4083 | 4103                | 89     | 68     |
| Qingnian Res.           | 2015.08.18    | 3  | 45.6722 | 131.8127 | 33                  | 11     | 10     |
| Nanyin Res.             | 2015.09.07    | 5  | 45.9653 | 124.5356 | 116                 | 17     | 13     |
| Daqing Res.             | 2015.09.12    | 11 | 46.7871 | 125.1011 | 52                  | 10     | 10     |
| Lake Tai                | 2015.07.15    | 6  | 31.2500 | 120.2500 | 2338                | 69     | 67     |
| Xiashan Res.            | 2014.10.03    | 6  | 36.4472 | 119.4723 | 101                 | 20     | 12     |
| Dongping Lake           | 2014.10.02    | 5  | 35.9712 | 116.1998 | 120                 | 20     | 15     |
| Weishan Lake            | 2014.10.03    | 3  | 34.6041 | 117.2339 | 167                 | 18     | 17     |
| Gaoyou Lake             | 2015.11.06    | 3  | 32.8800 | 119.2660 | 631                 | 40     | 32     |
| Lake Chao               | 2015.11.03    | 4  | 31.5700 | 117.5500 | 783                 | 30     | 30     |
| Hongze Lake             | 2015.11.05    | 6  | 33.3098 | 118.7060 | 1567                | 66     | 63     |
| Dongting Lake           | 2015.10.13    | 4  | 29.3455 | 112.9290 | 1368                | 137    | 67     |
| Poyang Lake             | 2015.11.01    | 4  | 29.3050 | 116.0779 | 922                 | 85     | 65     |
| Wuchang Lake            | 2015.11.02    | 6  | 30.2830 | 116.7300 | 78                  | 16     | 10     |
| Donghu Lake             | 2015.10.10    | 9  | 30.5500 | 114.3833 | 37                  | 12     | 11     |
| Yanxihu Lake            | 2015.10.10    | 9  | 30.5734 | 114.4831 | 16                  | 8      | 8      |
| Three Gorge Res.        | 2009.10       | 9  | 30.8842 | 110.9144 | 312                 | 124    | 8      |
| Zhelin Res.             | 2015.10.31    | 6  | 29.2755 | 115.3091 | 199                 | 16     | 16     |
| Longgan Lake            | 2015.11.01    | 7  | 29.9810 | 115.8160 | 29                  | 10     | 7      |
| Danjiangkou Res.        | 2015.10.07    | 5  | 32.6872 | 111.5862 | 379                 | 112    | 58     |
| Zhanghe Res.            | 2015.10.08    | 7  | 31.0102 | 112.0201 | 51                  | 13     | 10     |
| Yahekou Res.            | 2015.10.06    | 3  | 33.3064 | 112.6067 | 39                  | 10     | 10     |
| Xiaolangdi Res.         | 2015.10.05    | 9  | 34.9430 | 112.3011 | 89                  | 86     | 22     |
| Fuhai Res.              | 2015.07.16    | 6  | 46.7380 | 87.9889  | 25                  | 11     | 6      |
| Mengjin Res.            | 2015.07.19    | 5  | 44.1173 | 87.5472  | 12                  | 4      | 4      |
| Longyangxia Res.        | 2014.09.18    | 7  | 36.0628 | 100.7444 | 285                 | 46     | 11     |
| Liujiaxia Res.          | 2009.7.13     | 8  | 35.8472 | 103.2335 | 113                 | 20     | 6      |

|                           |            |    |         |          |      |     |    |
|---------------------------|------------|----|---------|----------|------|-----|----|
| Keluke Lake               | 2014.09.13 | 6  | 37.2881 | 96.8905  | 54   | 10  | 8  |
| Gyoring Lake              | 2014.09.16 | 7  | 34.9265 | 97.2963  | 526  | 23  | 23 |
| Pumuyong Co               | 2015.06.25 | 3  | 28.5667 | 90.3833  | 285  | 17  | 12 |
| Dianchi Lake              | 2015.10.20 | 5  | 24.9801 | 102.6411 | 305  | 40  | 20 |
| Fuxian Lake               | 2015.10.21 | 5  | 24.4917 | 102.8833 | 216  | 31  | 14 |
| Xingyun Lake              | 2015.10.21 | 3  | 24.3333 | 102.7751 | 36   | 11  | 6  |
| Qilu Lake                 | 2015.10.21 | 5  | 24.1751 | 102.7667 | 38   | 7   | 7  |
| Chenghai Lake             | 2015.10.23 | 6  | 26.5417 | 100.6583 | 75   | 19  | 6  |
| Erhai Lake                | 2015.10.24 | 5  | 25.7833 | 100.2011 | 239  | 40  | 14 |
| Hongfeng Lake             | 2015.10.18 | 4  | 26.4806 | 106.4107 | 32   | 14  | 11 |
| Beipanjiang Res.          | 2015.10.18 | 6  | 25.7877 | 105.4248 | 37   | 28  | 2  |
| <b>Saline water lakes</b> |            |    |         |          |      |     |    |
| Chagan Lake               | 2009.07.17 | 20 | 45.2583 | 124.2583 | 301  | 41  | 19 |
|                           | 2010.08.21 | 21 | 45.2583 | 124.2583 | 301  | 41  | 19 |
| Xindian Lake              | 2013.07.11 | 21 | 45.3500 | 124.2333 | 57   | 15  | 13 |
| Talahong                  | 2011.09.23 | 20 | 46.7599 | 124.2150 | 63   | 14  | 10 |
| Lamasi Lake               | 2015.09.08 | 5  | 46.2994 | 124.0970 | 59   | 18  | 11 |
| Dongdahui Lake            | 2015.09.07 | 11 | 46.1083 | 124.6500 | 15   | 8   | 6  |
| Xidahui Lake              | 2015.09.07 | 7  | 46.0233 | 124.5927 | 12   | 6   | 6  |
| Longhu Lake               | 2015.09.09 | 11 | 46.7250 | 124.3750 | 131  | 18  | 12 |
| Keqin Lake                | 2011.09.22 | 5  | 47.3000 | 124.2917 | 9    | 5   | 3  |
| Hulun Lake                | 2014.09.22 | 27 | 48.8851 | 117.3328 | 2126 | 90  | 36 |
| Beier Lake                | 2014.09.23 | 3  | 47.7833 | 117.7333 | 609  | 38  | 27 |
| Huhenuoer                 | 2014.09.23 | 11 | 48.2092 | 119.0573 | 20   | 8   | 7  |
| Fuhai Lake                | 2015.07.17 | 18 | 47.2848 | 87.3150  | 856  | 41  | 28 |
| Bositeng Lake             | 2015.07.11 | 15 | 41.9667 | 86.9667  | 1013 | 46  | 31 |
| Erbinur Lake              | 2015.07.14 | 17 | 44.8749 | 82.9357  | 511  | 32  | 25 |
| Jili Lake                 | 2015.07.14 | 6  | 46.9667 | 87.4333  | 170  | 18  | 16 |
| Ailike Lake               | 2015.07.18 | 8  | 44.5693 | 84.3270  | 19   | 6   | 4  |
| Qinghai Lake              | 2013.08.10 | 18 | 36.8917 | 100.1917 | 4250 | 80  | 42 |
| Tuosu Lake                | 2014.09.13 | 26 | 37.1417 | 96.9417  | 135  | 16  | 12 |
| Dongjinacuo               | 2014.09.15 | 8  | 35.2771 | 98.5867  | 232  | 21  | 12 |
| Nam Co                    | 2015.06.22 | 10 | 30.7167 | 90.6583  | 1956 | 67  | 44 |
| Siling Co                 | 2015.06.30 | 6  | 31.7583 | 88.9502  | 1783 | 63  | 46 |
| Bamu Co                   | 2015.06.27 | 10 | 31.2510 | 90.5833  | 199  | 24  | 14 |
| Yandrok Co                | 2015.06.24 | 5  | 28.8671 | 90.6528  | 590  | 102 | 12 |
| Mapayum Co                | 2015.07.04 | 3  | 30.6751 | 81.4083  | 416  | 26  | 23 |
| Langa Co                  | 2015.07.04 | 16 | 30.7418 | 81.2285  | 261  | 28  | 22 |
| Bangong Lake              | 2015.07.05 | 11 | 33.7198 | 78.8227  | 285  | 46  | 25 |
| CuoE                      | 2015.06.30 | 6  | 31.5916 | 88.7574  | 285  | 39  | 28 |

Table S2 Lakes in Northeast China sampled during ice covered season, some lakes were sampled two or three times during the past five years. Res. is the abbreviation for reservoir; N, numbers of samples collected; Lat., latitude; Long., longitude; A, area; L, average length in kilometer; W, average width in kilometer.

| Water types              | Sampling date | N | Lat.    | Long.    | A(km <sup>2</sup> ) | L (km) | W (km) |
|--------------------------|---------------|---|---------|----------|---------------------|--------|--------|
| <b>Ice covered lakes</b> |               |   |         |          |                     |        |        |
| Shitoukou Res.           | 2011.12.20    | 9 | 43.8471 | 125.8264 | 59                  | 17     | 6      |
| Chagan Lake              | 2012.01.17    | 8 | 45.2524 | 124.2924 | 301                 | 41     | 19     |
|                          | 2013.12.28    | 8 | 45.2524 | 124.2924 | 301                 | 41     | 19     |
| Erlong Lake              | 2011.01.24    | 8 | 43.0167 | 124.8167 | 98                  | 29     | 8      |
|                          | 2011.12.17    | 7 | 43.0167 | 124.8167 | 98                  | 29     | 8      |
| Xinlicheng Res.          | 2012.01.13    | 6 | 43.6586 | 125.3623 | 43                  | 22     | 6      |
|                          | 2013.01.17    | 7 | 43.6586 | 125.3623 | 43                  | 22     | 6      |
|                          | 2014.01.20    | 9 | 43.6586 | 125.3623 | 43                  | 22     | 6      |
| Xindian Lake             | 2013.07.11    | 7 | 45.3619 | 124.2867 | 57                  | 15     | 13     |
| Shuangyang Res.          | 2014.01.04    | 5 | 43.5323 | 125.7417 | 10                  | 6      | 4      |
| Kuli Lake                | 2012.12.06    | 6 | 45.8292 | 124.8598 | 80                  | 18     | 12     |
|                          | 2013.01.17    | 4 | 45.8292 | 124.8598 | 80                  | 18     | 12     |
| Talahong                 | 2011.12.23    | 4 | 46.7912 | 124.1524 | 63                  | 14     | 10     |
|                          | 2012.01.17    | 4 | 46.7912 | 124.1524 | 63                  | 14     | 10     |
| Yuepao Lake              | 2011.01.11    | 5 | 45.6167 | 124.3833 | 22                  | 10     | 4      |
|                          | 2012.12.01    | 8 | 45.6167 | 124.3833 | 22                  | 10     | 4      |
| Zhongnei Lake            | 2012.01.11    | 3 | 46.3167 | 125.0583 | 12                  | 5      | 4      |
|                          | 2014.12.06    | 5 | 46.3167 | 125.0583 | 12                  | 5      | 4      |
| Lamasi Lake              | 2014.01.08    | 4 | 46.2833 | 124.0917 | 59                  | 18     | 11     |
|                          | 2015.01.16    | 3 | 46.2833 | 124.0917 | 59                  | 13     | 12     |
| Dongdahui Lake           | 2011.12.07    | 3 | 46.1083 | 124.6500 | 15                  | 8      | 6      |
| Xidahui                  | 2011.12.07    | 3 | 46.1083 | 124.0583 | 12                  | 6      | 4      |
|                          | 2014.12.12    | 4 | 46.1083 | 124.0583 | 12                  | 6      | 4      |
| Nanyin Res.              | 2014.12.13    | 4 | 45.9521 | 124.5788 | 116                 | 17     | 13     |
|                          | 2015.12.12    | 3 | 45.9521 | 124.5788 | 116                 | 17     | 13     |
| Lianhuan Lake            | 2011.12.18    | 6 | 45.1234 | 129.6550 | 51                  | 32     | 3      |
|                          | 2014.01.03    | 6 | 45.1234 | 129.6550 | 51                  | 32     | 3      |
| Longhu Lake              | 2014.01.05    | 6 | 46.7250 | 124.3750 | 131                 | 18     | 12     |
|                          | 2015.12.27    | 3 | 46.7250 | 124.3750 | 131                 | 18     | 12     |
| Daqing Res.              | 2015.12.29    | 6 | 46.8196 | 125.1461 | 52                  | 10     | 10     |

Table S3 the cities sampled for urban water, the field trips were carried out four times only Changchun city, and water numbers represents the numbers of water bodies sampled, several samples were collected in some large urban waters (including lakes, ponds and rivers), thus the sample numbers may be greater than water numbers.

| City names | Sampling dates | Water numbers | Samples | Longitude | Latitude |
|------------|----------------|---------------|---------|-----------|----------|
| Changchun  | 2013.05.12     | 10            | 20      | 125.352   | 43.979   |
|            | 2013.06.29     | 8             | 16      | 125.352   | 43.979   |
|            | 2014.08.20     | 8             | 16      | 125.352   | 43.979   |
|            | 2015.07.17     | 8             | 16      | 125.352   | 43.979   |
| Siping     | 2014.07.28     | 4             | 12      | 124.594   | 43.807   |
| Dalian     | 2014.10.09     | 6             | 12      | 121.725   | 39.911   |
| Harbin     | 2014.08.26     | 10            | 18      | 126.705   | 45.862   |
| Shenyang   | 2014.08.15     | 8             | 18      | 123.421   | 41.872   |
| Chifeng    | 2013.09.24     | 3             | 6       | 117.527   | 43.24    |
| Tianjin    | 2014.07.28     | 8             | 10      | 117.213   | 39.131   |
| Beijing    | 2014.07.26     | 11            | 21      | 116.372   | 39.847   |
| Panjin     | 2015.09.04     | 6             | 8       | 122.071   | 41.012   |
| Weifang    | 2014.10.04     | 4             | 6       | 118.922   | 37.241   |
| Jingzhou   | 2014.10.07     | 6             | 6       | 112.236   | 30.331   |
| Wuhan      | 2015.10.09     | 6             | 10      | 114.374   | 30.558   |
| Guiyang    | 2015.09.17     | 6             | 6       | 106.629   | 26.651   |
| Nanning    | 2015.10.16     | 5             | 10      | 108.232   | 22.839   |
| Kunming    | 2015.10.15     | 5             | 10      | 102.706   | 25.047   |
