# Supplementary material for: A systematic examination of the relationships between CDOM and DOC in inland waters in China
Source: Copernicus journal article supplement (doi:10.5194/hess-2017-179), 2017-04-04

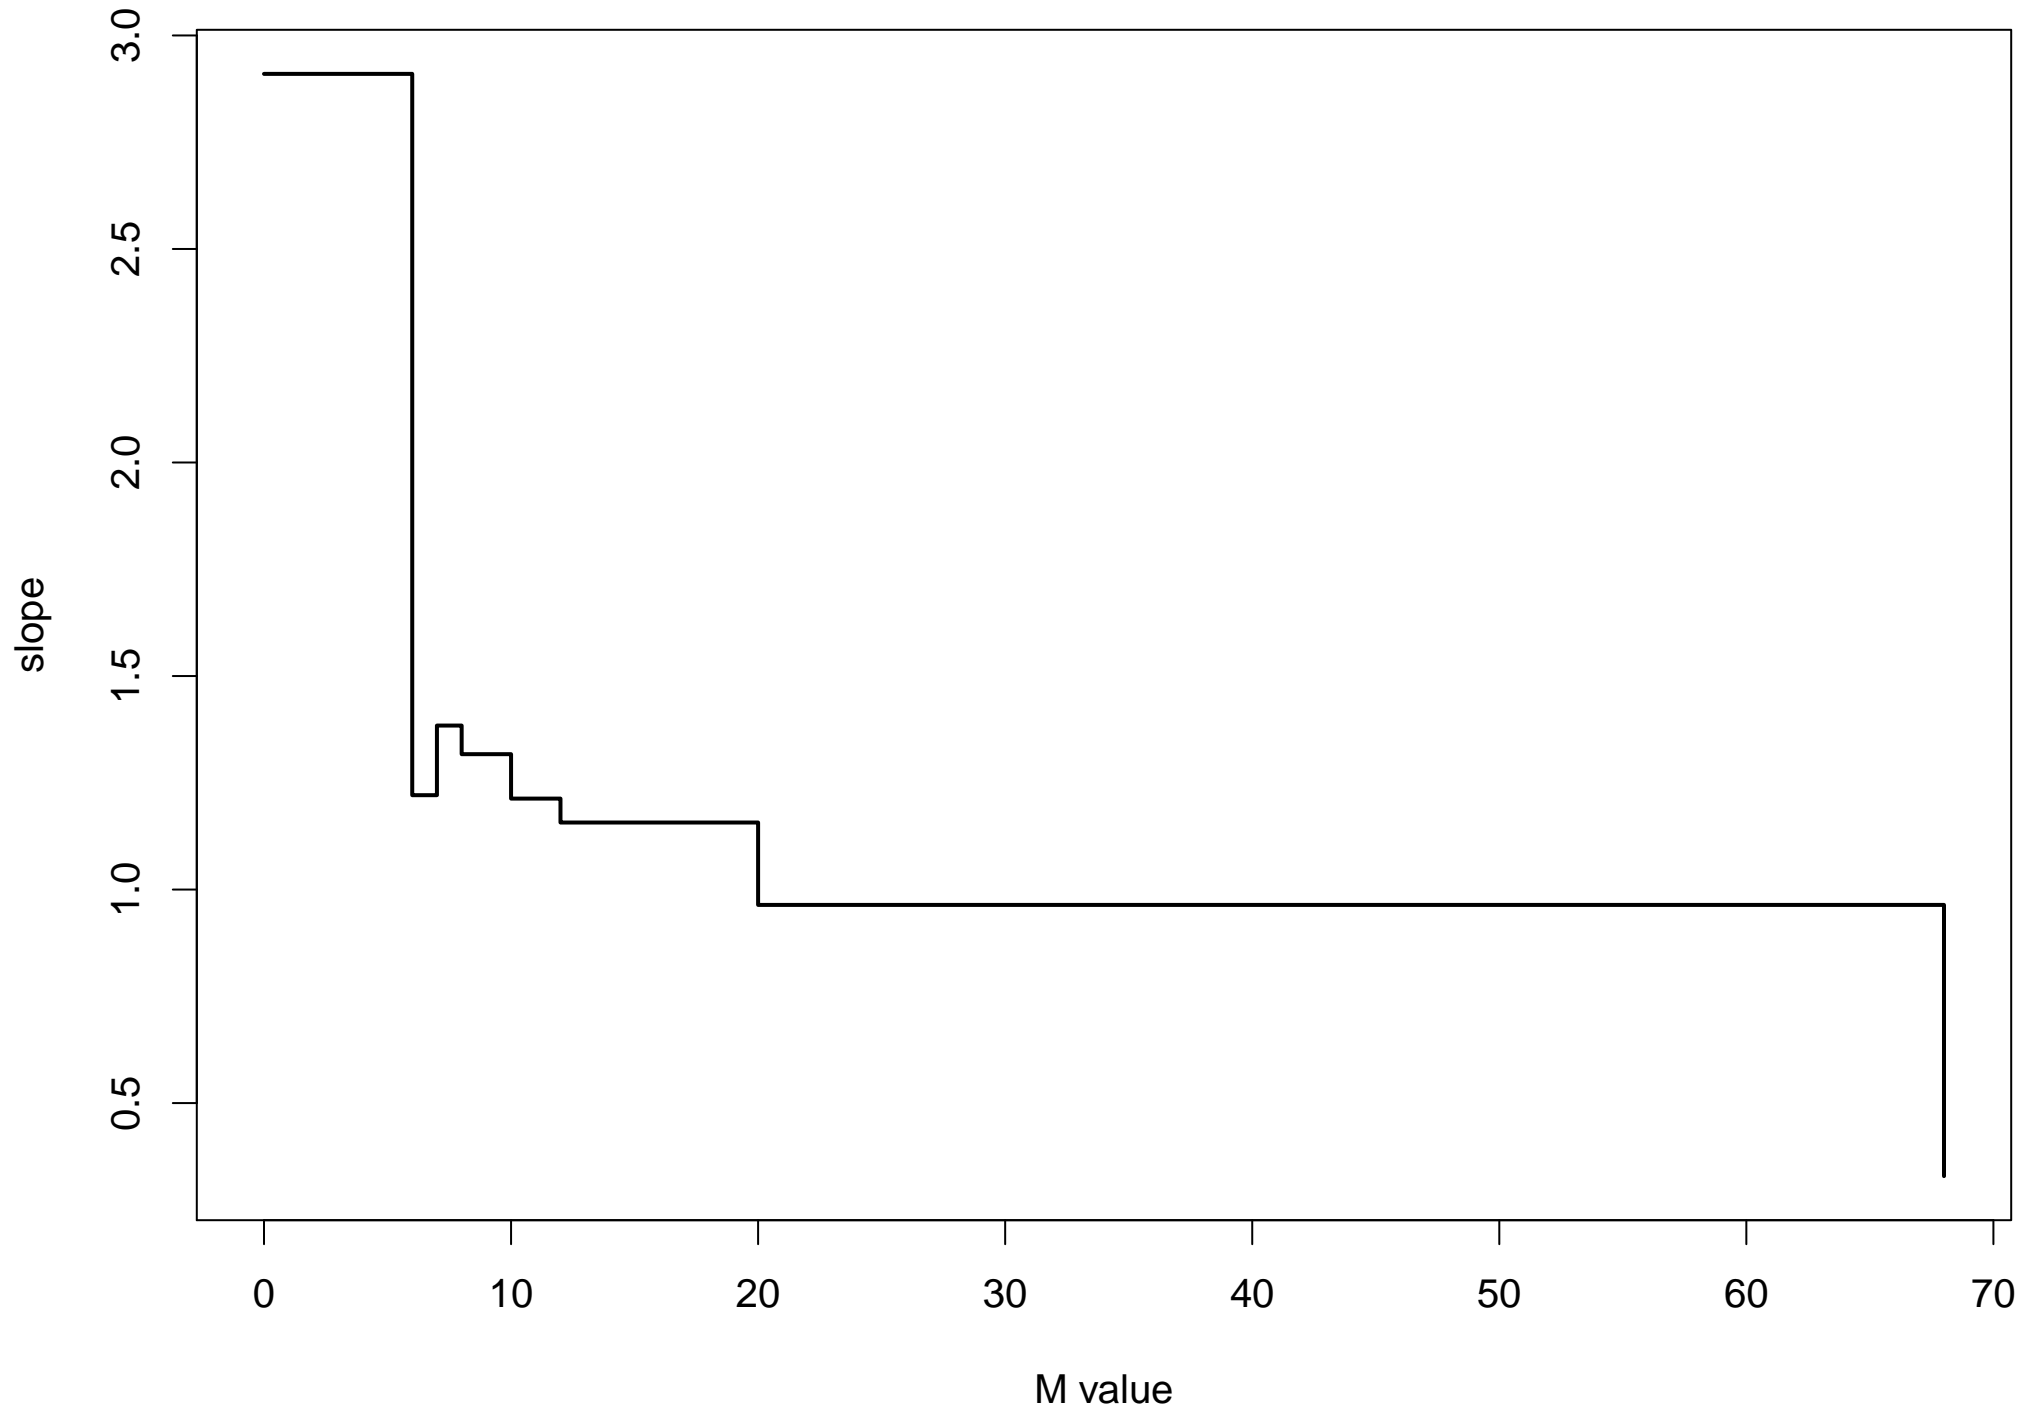

Supplement: Supplementary file [file hess-2017-179-EC2-supplement.pdf]
